# Supplementary material for: Microfluidic spinning of fucoxanthin-loaded nanofibers for enhancing antioxidation and clarification of fruit juice
Source: Royal Society of Chemistry journal article supplement (doi:10.1039/d1fo03766h), 2022-01-01
Supplement: d1fo03766h1.pdf [file d1fo03766h1.pdf]

## SUPPLEMENTARY INFORMATION

### **Microfluidic spinning of fucoxanthin-loaded nanofibers for enhancing antioxidation and clarification of fruit juice**

Jiaxuan Li<sup>abc</sup>, Yu Li<sup>abc</sup>, Xuedi Zhang<sup>abc</sup>, Wentao Su<sup>abc\*</sup>, Song Miao<sup>d</sup> and Mingqian Tan<sup>abc</sup>

*<sup>a</sup>Academy of Food Interdisciplinary Science, Dalian Polytechnic University, Qinggongyuan 1, Ganjingzi District, Dalian 116034, P. R. China*

*<sup>b</sup>National Engineering Research Center of Seafood, Dalian 116034, P. R. China*

*<sup>c</sup>Collaborative Innovation Center of Seafood Deep Processing, Dalian Polytechnic University, Dalian 116034, P. R. China*

*<sup>d</sup>Teagasc Food Research Centre Moorepark, Fermoy, Co. Cork, P61C996, Ireland*

\*To whom correspondence should be addressed. E-mail: suwentao2020@yeah.net, ORCID:

0000-0002-5233-1093. Qinggongyuan 1, Ganjingzi District, Dalian 116034, China

**Table S1.** The binding energy and combination type of inclusion complex.

| Target           | Compound    | Molar Ratio | Binding Energy (kcal/mol) | Combination Type        |
|------------------|-------------|-------------|---------------------------|-------------------------|
| HP- $\gamma$ -CD | Fucoxanthin | 1:1         | -8.46                     | Hydrogen bonds          |
| HP- $\gamma$ -CD | Fucoxanthin | 1:2         | -10.23                    | Hydrophobic interactive |

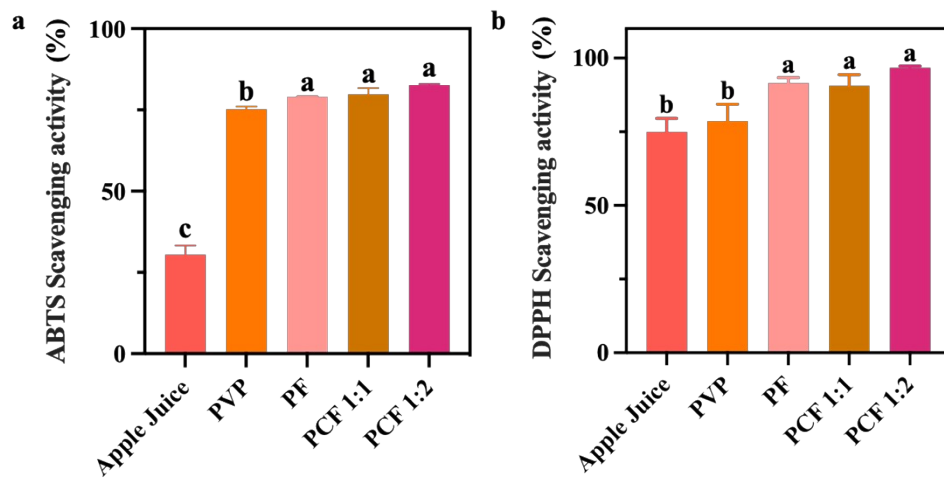

**Figure S1.** The (a) ABTS scavenging activity and (b) DPPH scavenging activity of apple juice treated with samples. Different letters represent significant differences ( $p < 0.05$ ).

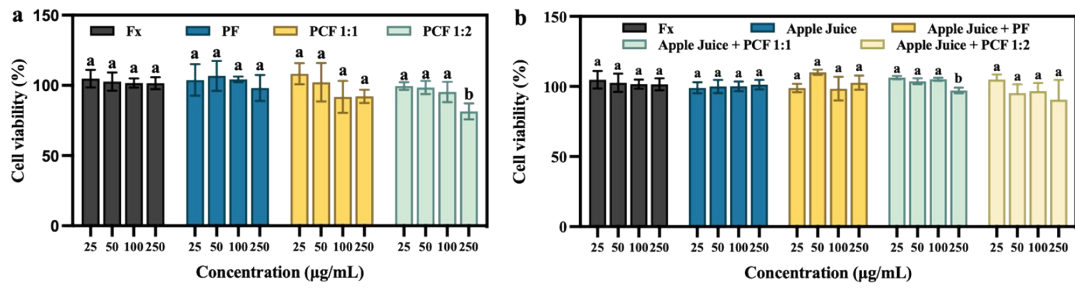

**Figure S2.** Cell viability of RAW264.7 cells incubated with (a) Fx, PF nanofibers, PCF 1:1 nanofibers and PCF 1:2 nanofibers. Cell viability of RAW264.7 cells after the treatment with Fx, apple juice, apple juice + PF nanofibers, apple juice + PCF 1:1 nanofibers and apple juice + PCF 1:2 nanofibers for 24 h at 37 °C. Data were represented as mean ± SD (n = 3).

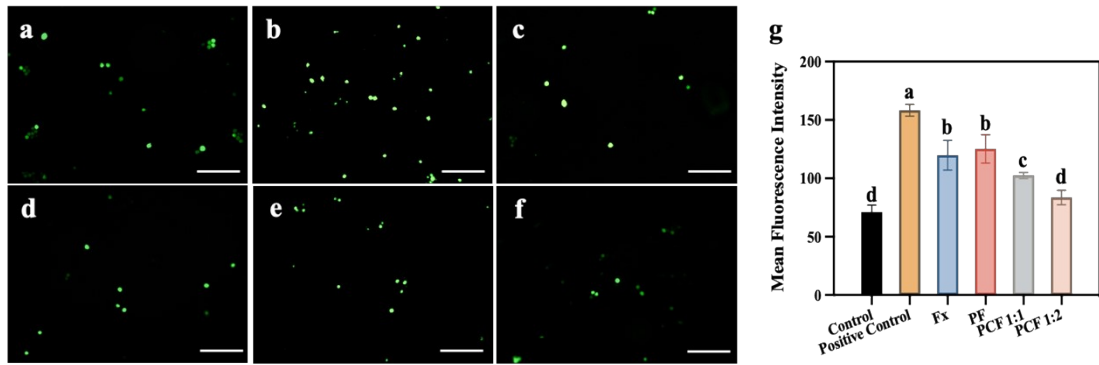

**Figure S3.** Fluorescent images of RAW264.7 cells stained with DCFH-DA after treatment of (a) DMEM medium (negative control), (b)  $H_2O_2$  (positive control), (c) Fx+  $H_2O_2$ , (d) PF nanofibers +  $H_2O_2$ , (e) PCF 1:1 nanofibers +  $H_2O_2$ , (f) PCF 1:2 nanofibers +  $H_2O_2$ . Relative fluorescence intensity of  $H_2O_2$  after treatment of (g) samples. The scale bar stood for 130  $\mu m$ .
